# Supplementary material for: Association of Hospital-Level Intensive Care Unit Use and Outcomes in Older Patients With Isolated Rib Fractures
Source: PubMed Central journal article supplement (PMC7677756; doi:10.1001/jamanetworkopen.2020.26500), 2020-11-19
Supplement: jamanetwopen-e2026500-s001.pdf [file jamanetwopen-e2026500-s001.pdf]

## Supplemental Online Content

Bowman JA, Nuño M, Jurkovich GJ, Utter GH. Association of hospital-level intensive care unit use and outcomes in older patients with isolated rib fractures. *JAMA Netw Open*. 2020;3(11):e2026500. doi:10.1001/jamanetworkopen.2020.26500

**eAppendix 1.** AIS Predot and *International Classification of Diseases* Codes for Rib Fractures

**eAppendix 2.** Propensity Scoring and Instrumental Variable Analysis Methods

**eTable 1.** Thoracic AIS Predot Codes (1998 Update of 1990 Version) Used for Exclusion Criteria in the 2015 NTDB Data Set

**eTable 2.** Thoracic AIS Predot Codes (2008 Update of the 2005 Version) Used for Exclusion Criteria in the 2016 NTDB Data Set

**eTable 3.** Baseline Physiologic Characteristics

**eTable 4.** Strength of Instrumental Variables Based on Hospital ICU Utilization in Predicting ICU Admission for Individual Patients

**eTable 5.** Covariate Balance by Exposure and Instrument Status

**eTable 6.** Patient-Level and Hospital-Level Characteristics Incorporated Into the Propensity Scores

**eFigure.** Rank Order Plot of Hospital-Level ICU Use

This supplemental material has been provided by the authors to give readers additional information about their work.

## eAppendix 1. AIS Predot and International Classification of Diseases Codes for Rib Fractures

### Codes defining rib fractures

#### AIS “predot” codes (1998 update of the 1990 version) used for the 2015 NTDB dataset

|        |                                                                                                                                              |
|--------|----------------------------------------------------------------------------------------------------------------------------------------------|
| 450210 | Multiple rib fractures, NFS                                                                                                                  |
| 450211 | Multiple rib fractures, NFS, with hemo-/pneumothorax                                                                                         |
| 450212 | 1 rib fracture                                                                                                                               |
| 450214 | 1 rib fracture, with hemo-/pneumothorax (OIS Grade I)                                                                                        |
| 450220 | 2-3 rib fractures any location or multiple fractures of single rib, with stable chest or NFS (OIS Grade I, II, III)                          |
| 450222 | 2-3 rib fractures any location or multiple fractures of single rib, with stable chest or NFS (OIS Grade I, II, III), with hemo-/pneumothorax |
| 450230 | >3 rib fractures on one side and no more than 3 ribs on the other side, stable chest or NFS (OIS Grade I, II, III)                           |
| 450232 | >3 rib fractures on one side and no more than 3 ribs on the other side, stable chest or NFS (OIS Grade I, II, III), with hemo-/pneumothorax  |
| 450240 | >3 rib fractures on each of two sides, with stable chest or NFS                                                                              |
| 450242 | >3 rib fractures on each of two sides, with stable chest or NFS, with hemo-/pneumothorax                                                     |
| 450250 | Open/displaced/comminuted (any or combination) ≥1 rib fracture                                                                               |
| 450252 | Open/displaced/comminuted (any or combination) ≥1 rib fracture, with hemo-/pneumothorax                                                      |
| 450260 | Flail chest (unstable chest wall, paradoxical chest movement), unilateral or NFS (OIS Grade III or IV)                                       |
| 450262 | Flail chest (unstable chest wall, paradoxical chest movement), unilateral or NFS, without lung contusion (OIS Grade III or IV)               |
| 450264 | Flail chest (unstable chest wall, paradoxical chest movement), unilateral or NFS, with lung contusion (OIS Grade III or IV)                  |
| 450266 | Flail chest (unstable chest wall, paradoxical chest movement), bilateral (OIS Grade V)                                                       |

#### AIS “predot” codes (2008 update of the 2005 version) used for the 2016 NTDB dataset

|        |                                                                          |
|--------|--------------------------------------------------------------------------|
| 450200 | Rib fracture(s) without flail, any location unilateral or bilateral NFS  |
| 450201 | Rib fracture, 1 rib (OIS Grade I)                                        |
| 450202 | Rib fractures, 2 ribs (OIS Grade I)                                      |
| 450203 | Rib fractures, ≥ 3 ribs (OIS Grade II)                                   |
| 450209 | Rib fractures with flail, NFS                                            |
| 450210 | Multiple rib fractures NFS                                               |
| 450211 | Rib fractures with unilateral flail chest, NFS (OIS Grade I)             |
| 450212 | Rib fractures with unilateral flail chest, 3-5 flail ribs (OIS Grade IV) |
| 450213 | Rib fractures with unilateral flail chest, >5 flail ribs (OIS Grade IV)  |
| 450214 | Rib fractures with bilateral flail chest (OIS Grade V)                   |

#### ICD-9-CM diagnosis codes

|        |                                                |
|--------|------------------------------------------------|
| 807.00 | Fracture of rib(s), unspecified, closed        |
| 807.01 | Fracture of one rib, closed                    |
| 807.02 | Fracture of two ribs, closed                   |
| 807.03 | Fracture of three ribs, closed                 |
| 807.04 | Fracture of four ribs, closed                  |
| 807.05 | Fracture of five ribs, closed                  |
| 807.06 | Fracture of six ribs, closed                   |
| 807.07 | Fracture of seven ribs, closed                 |
| 807.08 | Fracture of eight or more ribs, closed         |
| 807.09 | Fracture of multiple ribs, unspecified, closed |
| 807.10 | Fracture of rib(s), unspecified, open          |
| 807.11 | Fracture of one rib, open                      |
| 807.12 | Fracture of two ribs, open                     |

|        |                                              |
|--------|----------------------------------------------|
| 807.13 | Fracture of three ribs, open                 |
| 807.14 | Fracture of four ribs, open                  |
| 807.15 | Fracture of five ribs, open                  |
| 807.16 | Fracture of six ribs, open                   |
| 807.17 | Fracture of seven ribs, open                 |
| 807.18 | Fracture of eight or more ribs, open         |
| 807.19 | Fracture of multiple ribs, unspecified, open |
| 807.4  | Flail chest                                  |

#### ICD-10-CM diagnosis codes

|          |                                                                                     |
|----------|-------------------------------------------------------------------------------------|
| S22.31XA | Fracture of one rib, right side, initial encounter for closed fracture              |
| S22.31XB | Fracture of one rib, right side, initial encounter for open fracture                |
| S22.32XA | Fracture of one rib, left side, initial encounter for closed fracture               |
| S22.32XB | Fracture of one rib, left side, initial encounter for open fracture                 |
| S22.39XA | Fracture of one rib, unspecified side, initial encounter for closed fracture        |
| S22.39XB | Fracture of one rib, unspecified side, initial encounter for open fracture          |
| S22.41XA | Multiple fractures of ribs, right side, initial encounter for closed fracture       |
| S22.41XB | Multiple fractures of ribs, right side, initial encounter for open fracture         |
| S22.42XA | Multiple fractures of ribs, left side, initial encounter for closed fracture        |
| S22.42XB | Multiple fractures of ribs, left side, initial encounter for open fracture          |
| S22.43XA | Multiple fractures of ribs, bilateral, initial encounter for closed fracture        |
| S22.43XB | Multiple fractures of ribs, bilateral, initial encounter for open fracture          |
| S22.49XA | Multiple fractures of ribs, unspecified side, initial encounter for closed fracture |
| S22.49XB | Multiple fractures of ribs, unspecified side, initial encounter for open fracture   |
| S22.5XXA | Flail chest, initial encounter for closed fracture                                  |
| S22.5XXB | Flail chest, initial encounter for open fracture                                    |

#### ICD-10-CA diagnosis codes

|         |                                                          |
|---------|----------------------------------------------------------|
| S22.300 | Fracture of rib, closed                                  |
| S22.301 | Fracture of rib, open                                    |
| S22.400 | Multiple fractures of 2-4 ribs, closed                   |
| S22.401 | Multiple fractures of 2-4 ribs, open                     |
| S22.410 | Multiple fractures of 5 or more ribs, closed             |
| S22.411 | Multiple fractures of 5 or more ribs, open               |
| S22.490 | Multiple fractures of unspecified number of ribs, closed |
| S22.491 | Multiple fractures of unspecified number of ribs, open   |
| S22.500 | Flail chest, closed                                      |
| S22.501 | Flail chest, open                                        |

## eAppendix 2. Propensity Scoring and Instrumental Variable Analysis Methods

### Defining instruments: Mixed effects logistic regression models

As a strategy to address the possibility of confounding, we evaluated the validity of instrumental variable (IV) methods based on hospital ICU use. To estimate hospital-specific ICU use adjusted for case-mix and hospital characteristics, we used mixed-effects logistic regression models. We modeled hospital identity as a random effect and patient and hospital characteristics as fixed effects. To minimize the likelihood of model convergence problems, we used propensity scores rather than individual variables to adjust for all available patient and hospital characteristics. We derived propensity scores as described below (see “Propensity scoring”), but centered the propensity scores on the mean and estimated the probability that the average patient, defined as the patient with a mean propensity score, would be admitted to the ICU in each hospital. We created IV measures by assessing the distribution of random intercepts from the fully adjusted mixed-effects model and derived median, tertile, and quartile cutoff values. We then uniquely assigned each patient to median, tertile, and quartile groups using these cutoffs.

The multilevel analysis described above is a general method of analyzing data with a hierarchical or clustered structure. Multilevel models allow clinical decisions—such as the decision to admit patients to an ICU—to depend on patient, physician, and hospital fixed and random effects in complex ways, and have previously been applied for the profiling of health care providers. Our data set consists of two distinct levels: patient- and hospital-level information. We specified a mixed effects logistic regression model that allowed the patient-level outcome (being admitted to the ICU) to depend on patient and hospital fixed effects (embedded in the propensity score) as well as hospital random effects:

$$\ln\left(\frac{p_{ij}}{1-p_{ij}}\right) = \beta_0 + \beta_1 * PS\_centered_{ij} + b_j$$

- $p_{ij}$  :  $i^{\text{th}}$  patient of the  $j^{\text{th}}$  hospital’s probability of being admitted to the ICU
- $\beta_1$  : coefficient associated with the patient-level propensity score, centered on the mean
- $\beta_0$  : marginal (averaged across hospitals) probability of ICU admission for a patient with the mean propensity score (PS centered=0)
- $b_j$  : hospital-level random intercept
- $b_j \sim N(0, \sigma_b^2)$ , where  $\sigma_b^2$  is the between-hospital variance and represents the hospital-specific deviation from  $\beta_0$

The parameter of interest for the description of the variation in ICU tendency is  $\sigma_b^2$ . The hospital-specific probability of ICU utilization for the “average” or “typical” patient in the study is given by:

$$\frac{\exp(\beta_0 + b_j)}{1 + \exp(\beta_0 + b_j)}$$

The interval that contains the ICU preference probability for the 95% hospitals in the center of the range is given by:

$$\left( \frac{\exp(\beta_0 - 1.96\sigma_b)}{1 + \exp(\beta_0 - 1.96\sigma_b)} ; \frac{\exp(\beta_0 + 1.96\sigma_b)}{1 + \exp(\beta_0 + 1.96\sigma_b)} \right)$$

We assessed the plausibility of IV assumptions by: (1) computing the square of the semi-partial correlation between the instrument and ICU treatment, conditional on the other covariates in the model, to assess instrument strength; (2) assessing whether the instrument provided a natural experiment in treatment choice by evaluating whether the distributions of covariates between patients admitted to hospitals with the highest and lowest quantile groups were similar; and (3) examining the association between the IV and characteristics of hospitals associated with high-quality care (e.g., trauma center level) to evaluate empirically whether the IV might be related to the outcome (other than through exposure), thus violating the exogeneity assumption.

We sought to estimate the risk for each outcome associated with ICU admission using a two-stage prediction substitution generalized logistic regression model. We sought to assess whether each version of the instrument (i.e., median, tertile, quartile) influenced the observed associations.

In our analyses, instrumental variables based on hospital ICU utilization practices were strongly associated with actual ICU admission, explaining 0.05 to 10.2% of the variance in exposure in adjusted analysis (eTable 4). Patient characteristics were distributed similarly across quantiles based on IVs (eTable 5). However, the IVs were associated with other characteristics of hospitals reflecting or known to have a relationship with high-quality care (e.g., trauma center level, hospital size, and the occurrence of any complication), violating the exogeneity assumption. Because the exogeneity assumption is vital to the premise of an instrumental variable, violation of this assumption meant that this approach was not valid for the data we analyzed. Therefore, we present analyses using generalized linear mixed models instead.

### **Propensity scoring**

For the generalized linear mixed model analyses, we used propensity scores to adjust for potential confounding factors. Because inclusion of a large number of covariates can lead to convergence problems in multilevel models with relatively small cluster sizes, we adjusted for all patient and hospital characteristics available in the study dataset (eTable 6) with summary propensity scores rather than individual variables. We derived propensity scores from predicted probabilities of exposure (ICU admission versus non-ICU admission) estimated via a logistic regression model. We incorporated propensity scores into the generalized linear mixed models as simple probabilities, ranging from 0 to 1, without stratification or matching.

**eTable 1. Thoracic AIS Predot Codes (1998 Update of 1990 Version) Used for Exclusion Criteria in the 2015 NTDB Data Set**

| AIS "predot" code | AIS Score | Description                                                                                                         |
|-------------------|-----------|---------------------------------------------------------------------------------------------------------------------|
| 413000            | 6         | Bilateral destruction of skeletal, vascular, organ and tissue systems ("crush" injury)                              |
| 415000            | 4         | Open ("sucking") chest wound (OIS Grade IV)                                                                         |
| 416006            | 3         | Penetrating injury with blood loss >20% by volume                                                                   |
| 416008            | 3         | Penetrating injury with hemo-/pneumothorax except tension pneumothorax                                              |
| 410606            | 3         | Skin/subcutaneous/muscles/chest wall: laceration, blood loss >20% by volume                                         |
| 410806            | 3         | Skin/subcutaneous/muscles/chest wall: avulsion, blood loss >20% by volume                                           |
| 420299            | 4         | Aorta, thoracic, NFS                                                                                                |
| 420202            | 4         | Aorta, thoracic: intimal tear, no disruption                                                                        |
| 420204            | 5         | Aorta, thoracic: intimal tear, no disruption, with aortic valve involvement                                         |
| 420206            | 4         | Aorta, thoracic: laceration (perforation, puncture) NFS                                                             |
| 420208            | 4         | Aorta, thoracic: laceration (perforation, puncture): minor                                                          |
| 420210            | 5         | Aorta, thoracic: laceration (perforation, puncture): major                                                          |
| 420212            | 5         | Aorta, thoracic: laceration (perforation, puncture): major, with aortic root or valve involvement                   |
| 420216            | 5         | Aorta, thoracic: laceration (perforation, puncture): major, with hemorrhage confined to mediastinum                 |
| 420218            | 6         | Aorta, thoracic: laceration (perforation, puncture): major, with hemorrhage not confined to mediastinum             |
| 420499            | 3         | Brachiocephalic (innominate) artery NFS                                                                             |
| 420402            | 3         | Brachiocephalic (innominate) artery: intimal tear, no disruption                                                    |
| 420404            | 3         | Brachiocephalic (innominate) artery: laceration (perforation, puncture) NFS                                         |
| 420406            | 3         | Brachiocephalic (innominate) artery: laceration (perforation, puncture): minor                                      |
| 420408            | 4         | Brachiocephalic (innominate) artery: laceration (perforation, puncture): major                                      |
| 420699            | 3         | Brachiocephalic (innominate) vein NFS                                                                               |
| 420602            | 3         | Brachiocephalic (innominate) vein: laceration (perforation, puncture) NFS                                           |
| 420604            | 3         | Brachiocephalic (innominate) vein: laceration (perforation, puncture): minor                                        |
| 420606            | 4         | Brachiocephalic (innominate) vein: laceration (perforation, puncture): major                                        |
| 420608            | 5         | Brachiocephalic (innominate) vein: laceration (perforation, puncture): major, with air embolus right side           |
| 420800            | 5         | Coronary artery laceration or thrombosis (left main, right main or left anterior descending artery; coronary sinus) |
| 421099            | 3         | Pulmonary artery NFS                                                                                                |
| 421002            | 3         | Pulmonary artery: intimal tear, no disruption                                                                       |
| 421004            | 3         | Pulmonary artery: laceration (perforation, puncture) NFS                                                            |
| 421006            | 3         | Pulmonary artery: laceration (perforation, puncture): minor                                                         |
| 421008            | 4         | Pulmonary artery: laceration (perforation, puncture): major                                                         |
| 421299            | 3         | Pulmonary vein NFS                                                                                                  |
| 421202            | 3         | Pulmonary vein: laceration (perforation, puncture) NFS                                                              |
| 421204            | 3         | Pulmonary vein: laceration (perforation, puncture): minor                                                           |

**eTable 1. Thoracic AIS Predot Codes (1998 Update of 1990 Version) Used for Exclusion Criteria in the 2015 NTDB Data Set (continued)**

| AIS "predot" code | AIS Score | Description                                                                                                                                             |
|-------------------|-----------|---------------------------------------------------------------------------------------------------------------------------------------------------------|
| 421206            | 4         | Pulmonary vein: laceration (perforation, puncture): major                                                                                               |
| 421499            | 3         | Subclavian artery NFS                                                                                                                                   |
| 421402            | 3         | Subclavian artery: intimal tear, no disruption                                                                                                          |
| 421404            | 3         | Subclavian artery: laceration (perforation, puncture) NFS                                                                                               |
| 421406            | 3         | Subclavian artery: laceration (perforation, puncture): minor                                                                                            |
| 421408            | 4         | Subclavian artery: laceration (perforation, puncture): major                                                                                            |
| 421699            | 3         | Subclavian vein NFS                                                                                                                                     |
| 421602            | 3         | Subclavian vein: laceration (perforation, puncture) NFS                                                                                                 |
| 421604            | 3         | Subclavian vein: laceration (perforation, puncture): minor                                                                                              |
| 421606            | 4         | Subclavian vein: laceration (perforation, puncture): major                                                                                              |
| 421899            | 3         | Vena Cava, superior and thoracic portion of inferior, NFS                                                                                               |
| 421802            | 3         | Vena Cava, superior and thoracic portion of inferior: laceration (perforation, puncture) NFS                                                            |
| 421804            | 3         | Vena Cava, superior and thoracic portion of inferior: laceration (perforation, puncture): minor with or without thrombosis                              |
| 421806            | 4         | Vena Cava, superior and thoracic portion of inferior: laceration (perforation, puncture): major                                                         |
| 421808            | 5         | Vena Cava, superior and thoracic portion of inferior: laceration (perforation, puncture): major, with air embolus right side                            |
| 422008            | 3         | Other named arteries NFS (e.g., bronchial, esophageal, intercostal, internal mammary): laceration (perforation, puncture): major                        |
| 422206            | 3         | Other named veins NFS (e.g., azygos, bronchial, hemiazygos, intercostal, internal mammary, internal jugular): laceration (perforation, puncture): major |
| 440208            | 3         | Bronchus distal to main stem: laceration (puncture): perforation; full thickness but not complete transection                                           |
| 440210            | 4         | Bronchus distal to main stem: laceration (puncture): complex; avulsion; rupture; transection                                                            |
| 440212            | 3         | Bronchus distal to main stem: fracture NFS                                                                                                              |
| 440214            | 3         | Bronchus distal to main stem: fracture: simple                                                                                                          |
| 440216            | 4         | Bronchus distal to main stem: fracture: major (with separation)                                                                                         |
| 440400            | 5         | Chordae tendinae laceration (rupture)                                                                                                                   |
| 440604            | 3         | Diaphragm: laceration                                                                                                                                   |
| 440606            | 4         | Diaphragm: rupture with herniation                                                                                                                      |
| 440804            | 3         | Esophagus: laceration NFS                                                                                                                               |
| 440806            | 3         | Esophagus: laceration: no perforation; partial thickness; ≤50% circumference                                                                            |
| 440808            | 4         | Esophagus: laceration: perforation; full thickness but not complete transection; >50% circumference                                                     |
| 440810            | 5         | Esophagus: laceration complex with tissue loss; avulsion; rupture; transection                                                                          |
| 441006            | 4         | Heart (Myocardium): contusion (hematoma): major                                                                                                         |
| 441008            | 3         | Heart (Myocardium): laceration NFS                                                                                                                      |

**eTable 1. Thoracic AIS Predot Codes (1998 Update of 1990 Version) Used for Exclusion Criteria in the 2015 NTDB Data Set (continued)**

| AIS "predot" code | AIS Score | Description                                                                                                                                        |
|-------------------|-----------|----------------------------------------------------------------------------------------------------------------------------------------------------|
| 441010            | 3         | Heart (Myocardium): laceration: no perforation, no chamber involvement                                                                             |
| 441012            | 5         | Heart (Myocardium): laceration: perforation (ventricular or atrial with or without tamponade)                                                      |
| 441014            | 6         | Heart (Myocardium): laceration: perforation (ventricular or atrial with or without tamponade): complex or ventricular rupture                      |
| 441016            | 6         | Heart (Myocardium): laceration: perforation (ventricular or atrial with or without tamponade): multiple lacerations; >50% tissue loss of a chamber |
| 441018            | 6         | Heart (Myocardium): avulsion                                                                                                                       |
| 441200            | 5         | Intracardiac valve laceration (rupture)                                                                                                            |
| 441300            | 5         | Interventricular or interatrial septum laceration (rupture)                                                                                        |
| 441499            | 3         | Lung NFS                                                                                                                                           |
| 441420            | 4         | Lung laceration: with blood loss >20% by volume                                                                                                    |
| 441424            | 5         | Lung laceration: with parenchymal laceration with massive air leak                                                                                 |
| 441426            | 5         | Lung laceration: with systemic air embolus                                                                                                         |
| 441436            | 4         | Lung laceration: with blood loss >20% by volume                                                                                                    |
| 441440            | 5         | Lung laceration: unilateral: with parenchymal laceration with massive air leak                                                                     |
| 441442            | 5         | Lung laceration: unilateral: with systemic air embolus                                                                                             |
| 441456            | 5         | Lung laceration: bilateral: with blood loss >20% by volume                                                                                         |
| 441460            | 5         | Lung laceration: bilateral: with parenchymal laceration with massive air leak                                                                      |
| 441462            | 5         | Lung laceration: bilateral: with systemic air embolus                                                                                              |
| 441604            | 3         | Pericardium: injury with tamponade without heart injury                                                                                            |
| 441606            | 5         | Pericardium: herniation of heart                                                                                                                   |
| 442208            | 4         | Thoracic cavity injury: with blood loss >20% by volume                                                                                             |
| 442212            | 5         | Thoracic cavity injury: with systemic air embolism                                                                                                 |
| 442699            | 3         | Trachea and Main Stem Bronchus NFS                                                                                                                 |
| 442602            | 3         | Trachea and Main Stem Bronchus: contusion (hematoma)                                                                                               |
| 442604            | 3         | Trachea and Main Stem Bronchus: laceration NFS                                                                                                     |
| 442606            | 3         | Trachea and Main Stem Bronchus: laceration: no perforation; partial thickness                                                                      |
| 442608            | 4         | Trachea and Main Stem Bronchus: laceration: perforation; full thickness but not complete transection                                               |
| 442610            | 5         | Trachea and Main Stem Bronchus: laceration: complex; avulsion; rupture; transection                                                                |
| 442612            | 4         | Trachea and Main Stem Bronchus: fracture NFS                                                                                                       |
| 442614            | 4         | Trachea and Main Stem Bronchus: simple                                                                                                             |
| 442616            | 5         | Trachea and Main Stem Bronchus: major with laryngeal-tracheal separation                                                                           |

NFS, not further specified



**eTable 2. Thoracic AIS Predot Codes (2008 Update of the 2005 Version) Used for Exclusion Criteria in the 2016 NTDB Data Set**

| AIS "predot" code | AIS Score | Description                                                                                                                                                   |
|-------------------|-----------|---------------------------------------------------------------------------------------------------------------------------------------------------------------|
| 413000            | 6         | Crush injury                                                                                                                                                  |
| 415000            | 4         | Open ("sucking") chest wound                                                                                                                                  |
| 416006            | 3         | Penetrating injury with blood loss >20% by volume                                                                                                             |
| 410606            | 3         | Skin/subcutaneous/muscle: laceration, blood loss >20% b volume                                                                                                |
| 410806            | 3         | Skin/subcutaneous/muscle: avulsion, blood loss >20% by volume                                                                                                 |
| 420299            | 4         | Aorta, thoracic, NFS                                                                                                                                          |
| 420202            | 4         | Aorta, thoracic: intimal tear, no disruption                                                                                                                  |
| 420204            | 5         | Aorta, thoracic: intimal tear, no disruption, with aortic valve involvement                                                                                   |
| 420206            | 4         | Aorta, thoracic: laceration; perforation; puncture, NFS                                                                                                       |
| 420208            | 4         | Aorta, thoracic: laceration; perforation; puncture: minor; superficial; incomplete circumferential involvement; blood loss ≤20% by volume                     |
| 420210            | 5         | Aorta, thoracic: laceration; perforation; puncture: major; rupture; transection; segmental loss; blood loss >20% by volume                                    |
| 420212            | 5         | Aorta, thoracic: laceration; perforation; puncture: major; with aortic root or valve involvement                                                              |
| 420216            | 5         | Aorta, thoracic: laceration; perforation; puncture: major, with hemorrhage confined to mediastinum                                                            |
| 420218            | 6         | Aorta, thoracic: laceration; perforation; puncture: major, with hemorrhage not confined to mediastinum                                                        |
| 420499            | 3         | Brachiocephalic (innominate) artery NFS                                                                                                                       |
| 420402            | 3         | Brachiocephalic (innominate) artery: intimal tear, no disruption                                                                                              |
| 420404            | 3         | Brachiocephalic (innominate) artery: laceration; perforation; puncture, NFS                                                                                   |
| 420406            | 3         | Brachiocephalic (innominate) artery: laceration; perforation; puncture: minor; superficial; incomplete circumferential involvement; blood loss ≤20% by volume |
| 420408            | 4         | Brachiocephalic (innominate) artery: laceration; perforation; puncture: major; rupture; transection; segmental loss; blood loss >20% by volume                |
| 420800            | 5         | Coronary artery laceration or thrombosis to left main, right main or left anterior descending artery; coronary sinus                                          |
| 421099            | 3         | Pulmonary artery NFS                                                                                                                                          |
| 421002            | 3         | Pulmonary artery: intimal tear, no disruption                                                                                                                 |
| 421004            | 3         | Pulmonary artery: laceration; perforation; puncture, NFS                                                                                                      |
| 421006            | 3         | Pulmonary artery: laceration; perforation; puncture: minor; superficial; incomplete circumferential involvement; blood loss ≤20% by volume                    |
| 421008            | 5         | Pulmonary artery: laceration; perforation; puncture: major; rupture; transection; segmental loss; blood loss >20% by volume                                   |
| 421009            | 6         | Pulmonary artery: laceration; perforation; puncture: major; bilateral                                                                                         |
| 421499            | 3         | Subclavian artery NFS                                                                                                                                         |
| 421402            | 3         | Subclavian artery: intimal tear, no disruption                                                                                                                |
| 421404            | 3         | Subclavian artery: laceration; perforation; puncture, NFS                                                                                                     |
| 421406            | 3         | Subclavian artery: laceration; perforation; puncture: minor; superficial; incomplete circumferential involvement; blood loss ≤20% by volume                   |

**eTable 2. Thoracic AIS Predot Codes (2008 Update of the 2005 Version) Used for Exclusion Criteria in the 2016 NTDB Data Set (continued).**

| AIS "predot" code | AIS Score | Description                                                                                                                                                                    |
|-------------------|-----------|--------------------------------------------------------------------------------------------------------------------------------------------------------------------------------|
| 421408            | 4         | Subclavian artery: laceration; perforation; puncture: major; rupture; transection; segmental blood loss >20% by volume                                                         |
| 422008            | 3         | Other named arteries: laceration; perforation; puncture: major; rupture; transection; segmental loss; blood loss >20% by volume                                                |
| 420699            | 3         | Brachiocephalic (innominate) vein NFS                                                                                                                                          |
| 420602            | 3         | Brachiocephalic (innominate) vein: laceration; perforation; puncture, NFS                                                                                                      |
| 420604            | 3         | Brachiocephalic (innominate) vein: laceration; perforation; puncture: minor; superficial; incomplete circumferential involvement; blood loss ≤20% by volume                    |
| 420606            | 4         | Brachiocephalic (innominate) vein: laceration; perforation; puncture: major; rupture; transection; segmental loss; blood loss >20% by volume                                   |
| 420608            | 5         | Brachiocephalic (innominate) vein: laceration; perforation; puncture: major, with air embolus right side                                                                       |
| 421299            | 3         | Pulmonary vein NFS                                                                                                                                                             |
| 421202            | 3         | Pulmonary vein: laceration; perforation; puncture, NFS                                                                                                                         |
| 421204            | 3         | Pulmonary vein: laceration; perforation; puncture: minor; superficial; incomplete circumferential involvement; blood loss ≤20% by volume                                       |
| 421206            | 5         | Pulmonary vein: laceration; perforation; puncture: major; rupture; transection; segmental loss; blood loss >20% by volume                                                      |
| 421207            | 6         | Pulmonary vein: laceration; perforation; puncture: major; bilateral                                                                                                            |
| 421699            | 3         | Subclavian vein NFS                                                                                                                                                            |
| 421602            | 3         | Subclavian vein: laceration; perforation; puncture: NFS                                                                                                                        |
| 421604            | 3         | Subclavian vein: laceration; perforation; puncture: minor; superficial; incomplete circumferential involvement; blood loss ≤20% by volume                                      |
| 421606            | 4         | Subclavian vein: laceration; perforation; puncture: major; rupture; transection; segmental loss; blood loss >20% by volume                                                     |
| 421899            | 3         | Vena Cava, superior and thoracic portion of inferior, NFS                                                                                                                      |
| 421802            | 3         | Vena Cava, superior and thoracic portion of inferior: laceration; perforation; puncture, NFS                                                                                   |
| 421804            | 3         | Vena Cava, superior and thoracic portion of inferior: laceration; perforation; puncture: minor; superficial; incomplete circumferential involvement; blood loss ≤20% by volume |
| 421806            | 4         | Vena Cava, superior and thoracic portion of inferior: laceration perforation; puncture: major; rupture; transection; segmental loss; blood loss >20% by volume                 |
| 421808            | 5         | Vena Cava, superior and thoracic portion of inferior: laceration perforation; puncture: major, with air embolus right side                                                     |
| 422206            | 3         | Other named veins NFS: laceration; perforation; puncture: major; rupture; transection; segmental loss; blood loss >20% by volume                                               |
| 440199            | 3         | Bronchus, main stem, NFS                                                                                                                                                       |
| 440102            | 3         | Bronchus, main stem: contusion; hematoma                                                                                                                                       |
| 440104            | 3         | Bronchus, main stem: laceration; tear, NFS                                                                                                                                     |
| 440106            | 3         | Bronchus, main stem: laceration; tear: no perforation; partial thickness                                                                                                       |
| 440108            | 4         | Bronchus, main stem: laceration; tear: perforation; full thickness; "fracture"                                                                                                 |
| 440110            | 5         | Bronchus, main stem: laceration; tear: complex; avulsion; rupture; transection; with separation                                                                                |

**eTable 2. Thoracic AIS Predot Codes (2008 Update of the 2005 Version) Used for Exclusion Criteria in the 2016 NTDB Data Set (continued).**

| AIS "predot" code | AIS Score | Description                                                                                                                                 |
|-------------------|-----------|---------------------------------------------------------------------------------------------------------------------------------------------|
| 440208            | 3         | Bronchus distal to main stem: laceration; tear: perforation; full thickness; "fracture"                                                     |
| 440210            | 4         | Bronchus distal to main stem: laceration; tear: complex; avulsion; rupture; transection; with separation                                    |
| 440606            | 3         | Diaphragm: laceration ≤10 cm                                                                                                                |
| 440608            | 4         | Diaphragm: laceration >10 cm; with significant tissue loss                                                                                  |
| 440610            | 4         | Diaphragm: rupture with herniation                                                                                                          |
| 440805            | 3         | Esophagus injury in thorax: ingestion injury NFS                                                                                            |
| 440807            | 3         | Esophagus injury in thorax: ingestion injury: partial-thickness necrosis                                                                    |
| 440809            | 4         | Esophagus injury in thorax: ingestion injury: full-thickness necrosis                                                                       |
| 440804            | 3         | Esophagus: laceration; tear NFS                                                                                                             |
| 440806            | 3         | Esophagus: laceration; tear: no perforation; partial thickness; ≤50% circumference                                                          |
| 440808            | 4         | Esophagus: laceration; tear: perforation; full thickness; >50% circumference                                                                |
| 440810            | 5         | Esophagus: laceration; tear: avulsion; rupture; transection; massive destruction                                                            |
| 441006            | 4         | Heart (Myocardium): contusion: major                                                                                                        |
| 441008            | 3         | Heart (Myocardium): laceration NFS                                                                                                          |
| 441010            | 3         | Heart (Myocardium): laceration: no perforation, no chamber involvement                                                                      |
| 441012            | 5         | Heart (Myocardium): laceration: perforation, ventricular or atrial, with or without tamponade                                               |
| 441013            | 5         | Heart (Myocardium): laceration: perforation, with atrial rupture                                                                            |
| 441014            | 6         | Heart (Myocardium): laceration: perforation, with ventricular rupture                                                                       |
| 441016            | 6         | Heart (Myocardium): laceration: perforation: multiple lacerations; >50% tissue loss of a chamber                                            |
| 441018            | 6         | Heart (Myocardium): avulsion                                                                                                                |
| 440400            | 5         | Intracardiac chordae tendineae laceration; rupture                                                                                          |
| 441300            | 5         | Intracardiac septum laceration; rupture                                                                                                     |
| 441200            | 5         | Intracardiac valve laceration; rupture                                                                                                      |
| 441499            | 3         | Lung NFS                                                                                                                                    |
| 441426            | 5         | Lung: blast injury: severe; bilateral with air embolus                                                                                      |
| 419202            | 3         | Lung: inhalation injury: minor or patchy areas of erythema, bronchorrhea, carbonaceous deposits in proximal or distal bronchi               |
| 419204            | 4         | Lung: inhalation injury: moderate degree of erythema, carbonaceous deposits, bronchorrhea with or without compromise of the bronchi         |
| 419206            | 5         | Lung: inhalation injury: severe inflammation with friability, copious carbonaceous deposits, bronchorrhea, bronchial obstruction, hypoxemia |
| 419208            | 6         | Lung: inhalation injury: evidence of mucosal sloughing, necrosis, endoluminal obliteration                                                  |
| 441603            | 3         | Pericardium: hemopericardium NFS                                                                                                            |
| 441604            | 3         | Pericardium: hemopericardium: without cardiac tamponade or heart injury                                                                     |
| 441605            | 4         | Pericardium: hemopericardium: with cardiac tamponade but without heart injury                                                               |

**eTable 2. Thoracic AIS Predot Codes (2008 Update of the 2005 Version) Used for Exclusion Criteria in the 2016 NTDB Data Set (continued).**

| AIS "predot" code | AIS Score | Description                                                                                                                     |
|-------------------|-----------|---------------------------------------------------------------------------------------------------------------------------------|
| 441606            | 5         | Pericardium: hemopericardium: herniation of heart through pericardium                                                           |
| 442201            | 4         | Thoracic injury: hemothorax: major; >1000cc blood loss on at least one side                                                     |
| 442206            | 4         | Thoracic injury: hemopneumothorax: major; >1000cc blood loss on at least one side                                               |
| 442207            | 5         | Thoracic injury: air embolus                                                                                                    |
| 442210            | 3         | Thoracic injury: pneumomediastinum: with cardiac tamponade                                                                      |
| 442699            | 3         | Trachea injury in thorax, NFS                                                                                                   |
| 442602            | 3         | Trachea injury in thorax: contusion; hematoma                                                                                   |
| 442604            | 3         | Trachea injury in thorax: laceration, NFS                                                                                       |
| 442606            | 3         | Trachea injury in thorax: laceration: no perforation; partial thickness                                                         |
| 442608            | 4         | Trachea injury in thorax: laceration: perforation; full thickness; "fracture"                                                   |
| 442610            | 5         | Trachea injury in thorax: laceration: avulsion; rupture; transection; massive destruction; crush; laryngeal-tracheal separation |
| 451020            | 4         | Thoracic wall: avulsion of chest wall tissues including rib cage                                                                |
| 451021            | 4         | Thoracic wall: avulsion: minor; ≤15% of chest wall including rib cage                                                           |
| 451022            | 5         | Thoracic wall: avulsion: major; >15% of chest wall including rib cage                                                           |

NFS, not further specified

**eTable 3. Baseline Physiologic Characteristics**

|                                                              | Hospital-level proportion of older patients with isolated rib fractures admitted to an ICU |              |              |              | P value | Standardized difference between Quartiles 1 and 4 |
|--------------------------------------------------------------|--------------------------------------------------------------------------------------------|--------------|--------------|--------------|---------|---------------------------------------------------|
|                                                              | Quartile 1                                                                                 | Quartile 2   | Quartile 3   | Quartile 4   |         |                                                   |
|                                                              | 0-7.3%                                                                                     | 7.4-16.5%    | 16.6-32.0%   | 32.1-91.9%   |         |                                                   |
| Patient characteristic                                       | n = 5,336                                                                                  | n = 5,548    | n = 5,597    | n = 7,470    |         |                                                   |
| Systolic blood pressure at presentation (mmHg), n (%)        |                                                                                            |              |              |              | 0.65    | -0.02                                             |
| <90                                                          | 54 (1.0)                                                                                   | 54 (1.0)     | 65 (1.2)     | 70 (0.9)     |         |                                                   |
| ≥90                                                          | 5,206 (97.6)                                                                               | 5,411 (97.5) | 5,438 (97.2) | 7,271 (97.3) |         |                                                   |
| Not recorded                                                 | 76 (1.4)                                                                                   | 83 (1.5)     | 94 (1.7)     | 129 (1.7)    |         |                                                   |
| Heart rate at presentation (beats per minute), n (%)         |                                                                                            |              |              |              | <0.001  | -0.08                                             |
| <50                                                          | 34 (0.6)                                                                                   | 38 (0.7)     | 34 (0.6)     | 57 (0.8)     |         |                                                   |
| 50-99                                                        | 4,584 (85.9)                                                                               | 4,632 (83.5) | 4,706 (84.1) | 6,203 (83.0) |         |                                                   |
| ≥100                                                         | 652 (12.2)                                                                                 | 758 (13.7)   | 772 (13.8)   | 1,079 (14.4) |         |                                                   |
| Not recorded                                                 | 66 (1.2)                                                                                   | 120 (2.2)    | 85 (1.5)     | 131 (1.8)    |         |                                                   |
| Respiratory rate at presentation (breaths per minute), n (%) |                                                                                            |              |              |              | 0.56    | -0.01                                             |
| <12                                                          | 41 (0.8)                                                                                   | 36 (0.6)     | 44 (0.8)     | 47 (0.6)     |         |                                                   |
| 12-24                                                        | 4,917 (92.2)                                                                               | 5,130 (92.5) | 5,144 (91.9) | 6,882 (92.1) |         |                                                   |
| >24                                                          | 266 (5.0)                                                                                  | 276 (5.0)    | 295 (5.3)    | 372 (5.0)    |         |                                                   |
| Not recorded                                                 | 112 (2.1)                                                                                  | 106 (1.9)    | 114 (2.0)    | 169 (2.3)    |         |                                                   |
| Oxygen saturation at presentation (%), n (%)                 |                                                                                            |              |              |              | <0.001  | -0.09                                             |
| <90                                                          | 293 (5.5)                                                                                  | 265 (4.8)    | 244 (4.4)    | 261 (3.5)    |         |                                                   |
| 90-95                                                        | 1,830 (34.3)                                                                               | 1,783 (32.1) | 1,786 (31.9) | 2,355 (31.5) |         |                                                   |
| 96-100                                                       | 3,076 (57.6)                                                                               | 3,337 (60.2) | 3,207 (57.3) | 4,370 (58.5) |         |                                                   |
| Not recorded                                                 | 137 (2.6)                                                                                  | 163 (2.9)    | 360 (6.4)    | 484 (6.5)    |         |                                                   |

ICU, intensive care unit

**eTable 4. Strength of Instrumental Variables Based on Hospital ICU Utilization in Predicting ICU Admission for Individual Patients**

| Outcome                           | Unadjusted |           |                             | Adjusted   |           |                             |
|-----------------------------------|------------|-----------|-----------------------------|------------|-----------|-----------------------------|
|                                   | Risk Ratio | 95% CI    | Semi-partial R <sup>2</sup> | Risk Ratio | 95% CI    | Semi-partial R <sup>2</sup> |
| <b>Composite</b>                  |            |           |                             |            |           |                             |
| IV <sub>1</sub> : Median groups   | 0.17       | 0.16-0.18 | 0.088                       | 0.21       | 0.20-0.22 | 0.1019                      |
| IV <sub>2</sub> : Tertile groups  | 0.12       | 0.11-0.13 | 0.134                       | 0.15       | 0.14-0.16 | 0.0914                      |
| IV <sub>3</sub> : Quartile groups | 0.09       | 0.08-0.10 | 0.165                       | 0.13       | 0.12-0.14 | 0.0905                      |
| <b>Death</b>                      |            |           |                             |            |           |                             |
| IV <sub>1</sub> : Median groups   | 0.17       | 0.16-0.18 | 0.088                       | 0.21       | 0.20-0.22 | 0.1020                      |
| IV <sub>2</sub> : Tertile groups  | 0.12       | 0.11-0.13 | 0.134                       | 0.15       | 0.14-0.16 | 0.0910                      |
| IV <sub>3</sub> : Quartile groups | 0.09       | 0.08-0.10 | 0.165                       | 0.13       | 0.12-0.14 | 0.0900                      |
| <b>Pneumonia</b>                  |            |           |                             |            |           |                             |
| IV <sub>1</sub> : Median groups   | 0.17       | 0.16-0.18 | 0.088                       | 0.21       | 0.10-0.22 | 0.1019                      |
| IV <sub>2</sub> : Tertile groups  | 0.12       | 0.11-0.13 | 0.134                       | 0.15       | 0.14-0.16 | 0.0914                      |
| IV <sub>3</sub> : Quartile groups | 0.09       | 0.08-0.10 | 0.165                       | 0.13       | 0.12-0.14 | 0.0904                      |
| <b>Unplanned intubation</b>       |            |           |                             |            |           |                             |
| IV <sub>1</sub> : Median groups   | 0.17       | 0.16-0.18 | 0.088                       | 0.21       | 0.20-0.22 | 0.1019                      |
| IV <sub>2</sub> : Tertile groups  | 0.12       | 0.11-0.13 | 0.134                       | 0.15       | 0.14-0.16 | 0.0914                      |
| IV <sub>3</sub> : Quartile groups | 0.09       | 0.08-0.10 | 0.165                       | 0.13       | 0.12-0.14 | 0.0005                      |
| <b>ARDS</b>                       |            |           |                             |            |           |                             |
| IV <sub>1</sub> : Median groups   | 0.17       | 0.16-0.18 | 0.088                       | 0.21       | 0.19-0.22 | 0.1019                      |
| IV <sub>2</sub> : Tertile groups  | 0.12       | 0.11-0.13 | 0.134                       | 0.15       | 0.14-0.16 | 0.0914                      |
| IV <sub>3</sub> : Quartile groups | 0.09       | 0.08-0.10 | 0.165                       | 0.13       | 0.12-0.14 | 0.0905                      |
| <b>Unplanned ICU transfer</b>     |            |           |                             |            |           |                             |
| IV <sub>1</sub> : Median groups   | 0.17       | 0.16-0.18 | 0.088                       | 0.21       | 0.20-0.22 | 0.1019                      |
| IV <sub>2</sub> : Tertile groups  | 0.12       | 0.11-0.13 | 0.134                       | 0.15       | 0.14-0.16 | 0.0914                      |
| IV <sub>3</sub> : Quartile groups | 0.09       | 0.08-0.10 | 0.165                       | 0.13       | 0.12-0.14 | 0.0904                      |

All comparisons represent the highest quantile relative to the lowest; IV, instrumental variable.

**eTable 5. Covariate Balance by Exposure and Instrument Status**

| Covariate                                                  | Standardized Difference <sup>a</sup> |                                  |                                   |
|------------------------------------------------------------|--------------------------------------|----------------------------------|-----------------------------------|
|                                                            | IV <sub>1</sub> : Median groups      | IV <sub>2</sub> : Tertile groups | IV <sub>3</sub> : Quartile groups |
| Age in categories                                          | 0.0445                               | 0.0633                           | 0.121                             |
| Gender                                                     | 0.0263                               | 0.0209                           | 0.0247                            |
| Injury location (type of place where injury occurred)      | 0.1605                               | 0.2384                           | 0.2077                            |
| Injury type                                                | 0.0483                               | 0.1682                           | 0                                 |
| Injury intent                                              | 0.0483                               | 0.1495                           | 0.1495                            |
| Injury mechanism                                           | 0.251                                | 0.3205                           | 0.2596                            |
| Injury mechanism in categories                             | 0.1428                               | 0.1927                           | 0.2039                            |
| Type of transportation from scene of injury to hospital    | 0.1437                               | 0.2575                           | 0.2133                            |
| Patient transferred from another hospital                  | 0.1891                               | 0.266                            | 0.3466                            |
| Payer in categories                                        | 0.2929                               | 0.2182                           | 0.2543                            |
| Comorbidity: chronic obstructive pulmonary disease         | -0.0273                              | -0.0235                          | 0.0018                            |
| Comorbidity: smoking                                       | 0.0026                               | 0.0222                           | 0.0323                            |
| Comorbidity: functional dependency                         | 0.01                                 | 0.0244                           | 0.0501                            |
| Comorbidity: other                                         | -0.0643                              | -0.0892                          | -0.0842                           |
| Comorbidity: alcohol use disorder                          | -0.0067                              | -0.024                           | 0.0149                            |
| Comorbidity: bleeding disorder                             | -0.0208                              | -0.0182                          | -0.0062                           |
| Comorbidity: chemotherapy                                  | -0.0017                              | 0.0076                           | 0.0053                            |
| Comorbidity: congenital anomaly                            | 0.0361                               | 0.0236                           | 0.0263                            |
| Comorbidity: cerebrovascular accident (stroke)             | 0.0058                               | 0.001                            | 0.0203                            |
| Comorbidity: diabetes mellitus                             | 0.0113                               | 0.0214                           | 0.0135                            |
| Comorbidity: disseminated cancer                           | -0.0292                              | -0.0387                          | -0.0489                           |
| Comorbidity: limitation on care (e.g., advanced directive) | 0.0024                               | -0.0179                          | -0.0082                           |
| Comorbidity: angina                                        | 0.0125                               | 0.0111                           | 0.0154                            |
| Comorbidity: myocardial infarction                         | -0.0138                              | -0.0339                          | -0.0266                           |
| Comorbidity: peripheral vascular disease                   | -0.0054                              | 0.0085                           | 0.0229                            |
| Comorbidity: hypertension                                  | 0.0031                               | 0.0443                           | 0.0788                            |
| Comorbidity: prematurity                                   | 0.0125                               | 0.0146                           | 0.0166                            |
| Comorbidity: steroid use                                   | 0.0133                               | 0.019                            | 0.0189                            |
| Comorbidity: cirrhosis                                     | 0.029                                | 0.0562                           | 0.0691                            |
| Comorbidity: dementia                                      | -0.0297                              | -0.0365                          | -0.0014                           |
| Comorbidity: drug use disorder                             | -0.0059                              | -0.0169                          | -0.0246                           |
| Comorbidity: attention deficit hyperactivity disorder      | 0.0032                               | 0.0027                           | 0.0186                            |
| Alcohol use in categories                                  | 0.1278                               | 0.2437                           | 0.2106                            |
| Sedation/paralytic medication administered                 | 0.0603                               | 0.0852                           | 0.116                             |
| Systolic blood pressure in categories                      | 0.0823                               | 0                                | 0.0823                            |

**eTable 5. Covariate Balance by Exposure and Instrument Status (continued).**

| Covariate                                         | Standardized Difference <sup>a</sup> |                                  |                                   |
|---------------------------------------------------|--------------------------------------|----------------------------------|-----------------------------------|
|                                                   | IV <sub>1</sub> : Median groups      | IV <sub>2</sub> : Tertile groups | IV <sub>3</sub> : Quartile groups |
| Heart rate in categories                          | 0.0889                               | 0.0889                           | 0.1041                            |
| Respiratory rate in categories                    | 0.0713                               | 0.0483                           | 0                                 |
| Oxygen saturation in categories                   | 0.2965                               | 0.3246                           | 0.2978                            |
| Supplemental oxygen use in categories             | 0.2487                               | 0.2901                           | 0.2741                            |
| Glasgow Coma Scale total score in categories      | 0                                    | 0                                | 0.0406                            |
| Glasgow Coma Scale total score                    | 0.044                                | 0.044                            | 0.058                             |
| Injury Severity Score in categories               | 0.0443                               | 0.1697                           | 0.1768                            |
| Abbreviated Injury Scale score: head              | -0.023                               | -0.0401                          | -0.0335                           |
| Abbreviated Injury Scale score: face              | 0.0336                               | 0.0242                           | 0.0302                            |
| Abbreviated Injury Scale score: neck              | 0.003                                | 0.0141                           | 0.0226                            |
| Abbreviated Injury Scale score: thorax            | 0.244                                | .                                | .                                 |
| Abbreviated Injury Scale score: abdomen           | -0.0056                              | -0.0024                          | 0.0102                            |
| Abbreviated Injury Scale score: spine             | -0.0288                              | -0.0436                          | -0.0305                           |
| Abbreviated Injury Scale score: upper extremities | -0.0007                              | -0.0142                          | -0.0026                           |
| Abbreviated Injury Scale score: lower extremities | 0.0059                               | 0.0177                           | 0.0148                            |
| Abbreviated Injury Scale score: external          | -0.0392                              | -0.0632                          | -0.0578                           |
| Hemopneumothorax by AIS codes                     | 0.0126                               | 0.0213                           | 0.0292                            |
| Hemothorax by AIS codes                           | 0.0071                               | 0.005                            | -0.0032                           |
| Pneumothorax by AIS codes                         | -0.0059                              | -0.0224                          | -0.0183                           |
| Lung contusion by AIS codes                       | 0.0385                               | 0.0538                           | 0.0571                            |
| Lung laceration by AIS codes                      | 0.0134                               | 0.0308                           | 0.0284                            |
| Pneumomediastinum by AIS codes                    | 0.0191                               | 0.0171                           | 0.0217                            |
| Hemomediastinum by AIS codes                      | 0.0077                               | 0.0227                           | 0.0286                            |
| Flail chest by AIS codes                          | 0.0485                               | 0.0598                           | 0.0727                            |
| Sternal fracture by AIS codes                     | 0.0624                               | 0.0782                           | 0.0893                            |
| Hemopneumothorax by ICD codes                     | 0.0207                               | 0.0343                           | 0.0437                            |
| Hemothorax by ICD codes                           | 0.0399                               | 0.0691                           | 0.0808                            |
| Pneumothorax by ICD codes                         | 0.0206                               | 0.0257                           | 0.0336                            |
| Lung contusion by ICD codes                       | 0.0478                               | 0.0651                           | 0.0699                            |
| Lung laceration by ICD codes                      | 0.018                                | 0.0369                           | 0.0451                            |
| Open rib fracture by ICD codes                    | 0.0136                               | 0.0274                           | 0.0218                            |
| Flail chest by ICD codes                          | 0.0505                               | 0.0686                           | 0.0811                            |
| Sternal fracture by ICD codes                     | 0.0648                               | 0.083                            | 0.0945                            |
| Clavicle fracture by ICD codes                    | 0.0691                               | 0.0702                           | 0.0725                            |
| Scapula fracture by ICD codes                     | 0.0527                               | 0.0468                           | 0.0644                            |
| Hemopneumothorax by either AIS or ICD codes       | 0.0275                               | 0.0358                           | 0.0446                            |



**eTable 5. Covariate Balance by Exposure and Instrument Status (continued).**

| Covariate                                           | Standardized Difference <sup>a</sup> |                                  |                                   |
|-----------------------------------------------------|--------------------------------------|----------------------------------|-----------------------------------|
|                                                     | IV <sub>1</sub> : Median groups      | IV <sub>2</sub> : Tertile groups | IV <sub>3</sub> : Quartile groups |
| Hemothorax by either AIS or ICD codes               | 0.0385                               | 0.0651                           | 0.0767                            |
| Pneumothorax by either AIS or ICD codes             | 0.025                                | 0.0259                           | 0.0335                            |
| Lung contusion by either AIS or ICD codes           | 0.0487                               | 0.0653                           | 0.0697                            |
| Lung laceration by either AIS or ICD codes          | 0.0165                               | 0.0326                           | 0.0343                            |
| Flail chest by either AIS or ICD codes              | 0.0533                               | 0.0645                           | 0.0799                            |
| Sternal fracture by either AIS or ICD codes         | 0.0527                               | 0.0468                           | 0.0644                            |
| Number of fractured ribs by either AIS or ICD codes | 0.1174                               | 0.1182                           | 0.1569                            |
| Chest tube placed                                   | -0.0064                              | -0.0008                          | 0.0127                            |

IV, instrumental variable; AIS, Abbreviated Injury Scale; ICD, International Classification of Diseases

<sup>a</sup><0.1 signifies covariate balance

**eTable 6. Patient-Level and Hospital-Level Characteristics Incorporated Into the Propensity Scores**

| Level   | Description                                                | Variable format | Number of categories | Description of categories, if different than as defined or presented in the NTDB                                                           |
|---------|------------------------------------------------------------|-----------------|----------------------|--------------------------------------------------------------------------------------------------------------------------------------------|
| patient | age in categories                                          | categorical     | 5                    | 65-69; 70-74; 75-79; 80-84; or 85-89 (years)                                                                                               |
| patient | gender                                                     | dichotomous     | 2                    | (as defined/presented in NTDB)                                                                                                             |
| patient | injury location (type of place where injury occurred)      | categorical     | 10                   | Home; farm; industry; recreation; street; public building; residential institution; other; unspecified; or location not known/not recorded |
| patient | injury type                                                | categorical     | 5                    | (as defined/presented in NTDB)                                                                                                             |
| patient | injury intent                                              | categorical     | 6                    | (as defined/presented in NTDB)                                                                                                             |
| patient | injury mechanism                                           | categorical     | 24                   | (as defined/presented in NTDB)                                                                                                             |
| patient | type of transportation from scene of injury to hospital    | categorical     | 8                    | (as defined/presented in NTDB)                                                                                                             |
| patient | patient transferred from another hospital                  | dichotomous     | 2                    | (as defined/presented in NTDB)                                                                                                             |
| patient | payer in categories                                        | categorical     | 9                    | (as defined/presented in NTDB)                                                                                                             |
| patient | comorbidity: chronic obstructive pulmonary disease         | dichotomous     | 2                    | (as defined/presented in NTDB)                                                                                                             |
| patient | comorbidity: smoking                                       | dichotomous     | 2                    | (as defined/presented in NTDB)                                                                                                             |
| patient | comorbidity: functional dependency                         | dichotomous     | 2                    | (as defined/presented in NTDB)                                                                                                             |
| patient | comorbidity: other                                         | dichotomous     | 2                    | (as defined/presented in NTDB)                                                                                                             |
| patient | comorbidity: alcohol use disorder                          | dichotomous     | 2                    | (as defined/presented in NTDB)                                                                                                             |
| patient | comorbidity: bleeding disorder                             | dichotomous     | 2                    | (as defined/presented in NTDB)                                                                                                             |
| patient | comorbidity: chemotherapy                                  | dichotomous     | 2                    | (as defined/presented in NTDB)                                                                                                             |
| patient | comorbidity: congenital anomaly                            | dichotomous     | 2                    | (as defined/presented in NTDB)                                                                                                             |
| patient | comorbidity: cerebrovascular accident (stroke)             | dichotomous     | 2                    | (as defined/presented in NTDB)                                                                                                             |
| patient | comorbidity: diabetes mellitus                             | dichotomous     | 2                    | (as defined/presented in NTDB)                                                                                                             |
| patient | comorbidity: disseminated cancer                           | dichotomous     | 2                    | (as defined/presented in NTDB)                                                                                                             |
| patient | comorbidity: limitation on care (e.g., advanced directive) | dichotomous     | 2                    | (as defined/presented in NTDB)                                                                                                             |
| patient | comorbidity: angina                                        | dichotomous     | 2                    | (as defined/presented in NTDB)                                                                                                             |

**eTable 6. Patient-Level and Hospital-Level Characteristics Incorporated Into the Propensity Scores (continued).**

| Level   | Description                                           | Variable format | Number of categories | Description of categories, if different than as defined or presented in the NTDB       |
|---------|-------------------------------------------------------|-----------------|----------------------|----------------------------------------------------------------------------------------|
| patient | comorbidity: myocardial infarction                    | dichotomous     | 2                    | (as defined/presented in NTDB)                                                         |
| patient | comorbidity: peripheral vascular disease              | dichotomous     | 2                    | (as defined/presented in NTDB)                                                         |
| patient | comorbidity: hypertension                             | dichotomous     | 2                    | (as defined/presented in NTDB)                                                         |
| patient | comorbidity: prematurity                              | dichotomous     | 2                    | (as defined/presented in NTDB)                                                         |
| patient | comorbidity: steroid use                              | dichotomous     | 2                    | (as defined/presented in NTDB)                                                         |
| patient | comorbidity: cirrhosis                                | dichotomous     | 2                    | (as defined/presented in NTDB)                                                         |
| patient | comorbidity: dementia                                 | dichotomous     | 2                    | (as defined/presented in NTDB)                                                         |
| patient | comorbidity: drug use disorder                        | dichotomous     | 2                    | (as defined/presented in NTDB)                                                         |
| patient | comorbidity: attention deficit hyperactivity disorder | dichotomous     | 2                    | (as defined/presented in NTDB)                                                         |
| patient | alcohol use in categories                             | categorical     | 6                    | (as defined/presented in NTDB)                                                         |
| patient | sedation/paralytic medication administered            | dichotomous     | 2                    | (as defined/presented in NTDB)                                                         |
| patient | systolic blood pressure in categories                 | categorical     | 3                    | ≥90, <90, or not known/recorded (mmHg)                                                 |
| patient | heart rate in categories                              | categorical     | 4                    | <50, 50-99, ≥100, or not known/recorded (beats/minute)                                 |
| patient | respiratory rate in categories                        | categorical     | 8                    | 0-5, 6-9, 10-11, 12-24, 25-34, 35-49, ≥50, or not known/recorded (respirations/minute) |
| patient | oxygen saturation in categories                       | categorical     | 5                    | <80, 80-89, 90-95, 96-100, or not known/recorded (%)                                   |
| patient | supplemental oxygen use in categories                 | categorical     | 4                    | (as defined/presented in NTDB)                                                         |
| patient | Glasgow Coma Scale total score                        | categorical     | 9                    | (as defined/presented in NTDB)                                                         |
| patient | Injury Severity Score in categories                   | categorical     | 5                    | 1-9, 10-16, 17-24, 25+, or not described                                               |
| patient | Abbreviated Injury Scale score: head                  | dichotomous     | 2                    | (as defined/presented in NTDB)                                                         |
| patient | Abbreviated Injury Scale score: face                  | dichotomous     | 2                    | (as defined/presented in NTDB)                                                         |

**eTable 6. Patient-Level and Hospital-Level Characteristics Incorporated Into the Propensity Scores (continued)s**

| Level   | Description                                       | Variable format | Number of categories | Description of categories, if different than as defined or presented in the NTDB |
|---------|---------------------------------------------------|-----------------|----------------------|----------------------------------------------------------------------------------|
| patient | Abbreviated Injury Scale score: neck              | dichotomous     | 2                    | (as defined/presented in NTDB)                                                   |
| patient | Abbreviated Injury Scale score: thorax            | categorical     | 6                    | (as defined/presented in NTDB)                                                   |
| patient | Abbreviated Injury Scale score: abdomen           | dichotomous     | 2                    | (as defined/presented in NTDB)                                                   |
| patient | Abbreviated Injury Scale score: spine             | dichotomous     | 2                    | (as defined/presented in NTDB)                                                   |
| patient | Abbreviated Injury Scale score: upper extremities | dichotomous     | 2                    | (as defined/presented in NTDB)                                                   |
| patient | Abbreviated Injury Scale score: lower extremities | dichotomous     | 2                    | (as defined/presented in NTDB)                                                   |
| patient | Abbreviated Injury Scale score: external          | dichotomous     | 2                    | (as defined/presented in NTDB)                                                   |
| patient | pneumomediastinum by AIS codes                    | dichotomous     | 2                    | (based on AIS codes, as presented in NTDB)                                       |
| patient | hemomediastinum by AIS codes                      | dichotomous     | 2                    | (based on AIS codes, as presented in NTDB)                                       |
| patient | open rib fracture by ICD codes                    | dichotomous     | 2                    | (based on ICD codes, as presented in NTDB)                                       |
| patient | clavicle fracture by ICD codes                    | dichotomous     | 2                    | (based on ICD codes, as presented in NTDB)                                       |
| patient | scapula fracture by ICD codes                     | dichotomous     | 2                    | (based on ICD codes, as presented in NTDB)                                       |
| patient | hemopneumothorax by either AIS or ICD codes       | dichotomous     | 2                    | (based on AIS and ICD codes, as presented in NTDB)                               |
| patient | hemothorax by either AIS or ICD codes             | dichotomous     | 2                    | (based on AIS and ICD codes, as presented in NTDB)                               |
| patient | pneumothorax by either AIS or ICD codes           | dichotomous     | 2                    | (based on AIS and ICD codes, as presented in NTDB)                               |
| patient | lung contusion by either AIS or ICD codes         | dichotomous     | 2                    | (based on AIS and ICD codes, as presented in NTDB)                               |
| patient | lung laceration by either AIS or ICD codes        | dichotomous     | 2                    | (based on AIS and ICD codes, as presented in NTDB)                               |
| patient | flail chest by either AIS or ICD codes            | dichotomous     | 2                    | (based on AIS and ICD codes, as presented in NTDB)                               |
| patient | sternal fracture by either AIS or ICD codes       | dichotomous     | 2                    | (based on AIS and ICD codes, as presented in NTDB)                               |

**eTable 6. Patient-Level and Hospital-Level Characteristics Incorporated Into the Propensity Scores (continued)**

| Level    | Description                                                        | Variable format | Number of categories | Description of categories, if different than as defined or presented in the NTDB                                                                                                 |
|----------|--------------------------------------------------------------------|-----------------|----------------------|----------------------------------------------------------------------------------------------------------------------------------------------------------------------------------|
| patient  | number of fractured ribs by either AIS or ICD codes                | categorical     | 10                   | 1; 2; 3; 4; 5; 6; 7; 8+; multiple; or unspecified number of fractured ribs                                                                                                       |
| patient  | chest tube placed                                                  | dichotomous     | 2                    | (based on ICD codes)                                                                                                                                                             |
| hospital | trauma center level                                                | categorical     | 5                    | I; II; III; IV; or not applicable (as determined by American College of Surgeons level or state level designation, with American College of Surgeons level trumping state level) |
| hospital | teaching status of hospital                                        | categorical     | 3                    | (as defined/presented in NTDB)                                                                                                                                                   |
| hospital | region of country in categories                                    | categorical     | 5                    | (as defined/presented in NTDB)                                                                                                                                                   |
| hospital | number of adult inpatient beds, in categories                      | categorical     | 6                    | (as defined/presented in NTDB)                                                                                                                                                   |
| hospital | number of ICU beds, in categories                                  | categorical     | 7                    | (as defined/presented in NTDB)                                                                                                                                                   |
| hospital | number of attending trauma surgeons, in categories                 | categorical     | 5                    | (as defined/presented in NTDB)                                                                                                                                                   |
| hospital | volume of aged patients with isolated rib fractures, in categories | categorical     | 5                    | 10-19; 20-39; 40-59; 60-79; or 80+ eligible hospitalizations/year                                                                                                                |
| hospital | presence of stepdown unit                                          | dichotomous     | 2                    | (as determined empirically from the data)                                                                                                                                        |
| hospital | volume of aged injured patients, in categories                     | categorical     | 6                    | 0-<10, 10-<20, 20-<30, 30-<40, 40-<50, 50-100 (%)                                                                                                                                |
| hospital | volume of patients with blunt injury, in categories                | categorical     | 6                    | 0-<75, 75-<80, 80-<85, 85-<90, 90-<95, 95-100 (%)                                                                                                                                |

NTDB, National Trauma Data Bank; AIS, Abbreviated Injury Scale; ICD, International Classification of Diseases; ICU, intensive care unit

### eFigure. Rank Order Plot of Hospital-Level ICU Use

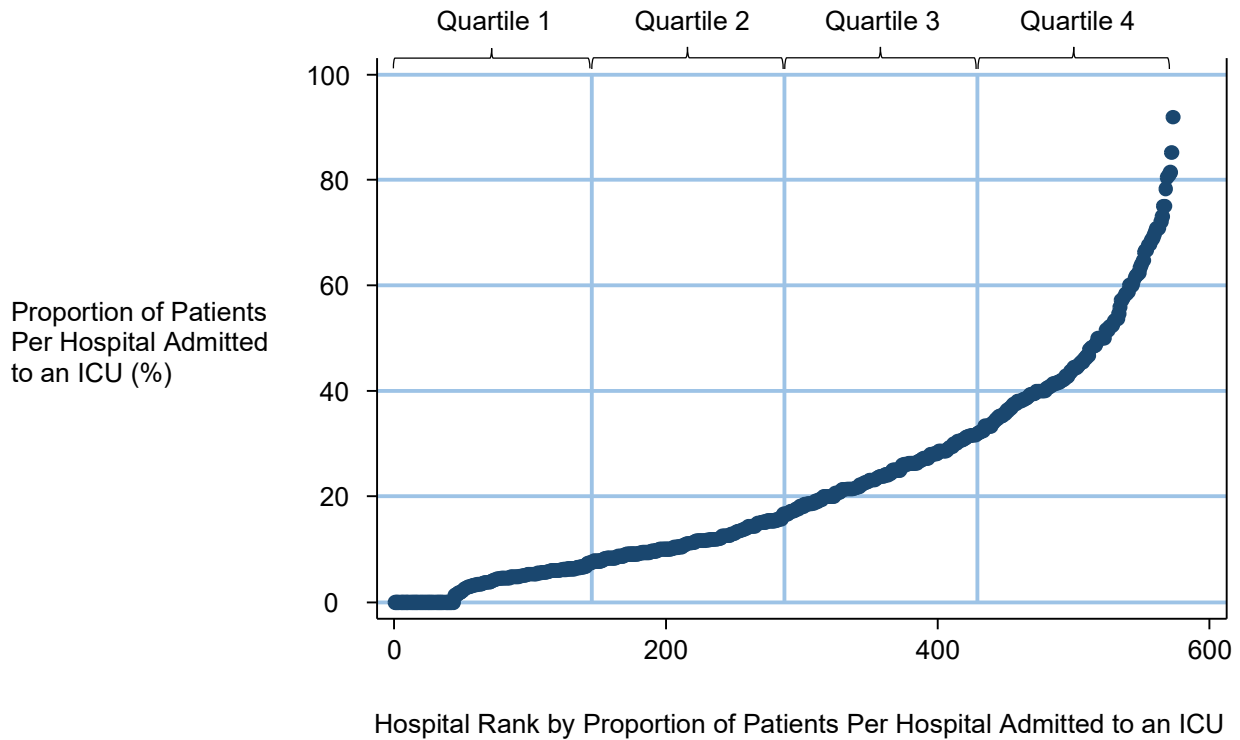

Each plotted point represents a hospital included in the study. Brackets represent the quartiles used for the analysis: quartile 1 includes hospitals with 0.0-7.3% of older patients with isolated rib fractures admitted to an ICU, quartile 2 includes hospitals with 7.4-16.5% admitted to an ICU, quartile 3 includes hospitals with 16.6-32.0% admitted to an ICU, and quartile 4 includes hospitals with 32.1-91.9% admitted to an ICU.
